# Supplementary material for: Predictor of Early Remission of Diabetic Macular Edema under As-Needed Intravitreal Ranibizumab
Source: PubMed Central journal article supplement (PMC6527559; doi:10.1038/s41598-019-44078-6), 2019-05-20
Supplement: 41598_2019_44078_MOESM1_ESM.pdf [file 41598_2019_44078_MOESM1_ESM.pdf]

## **Supplementary Information**

### **Predictor of Early Remission of Diabetic Macular Edema under As-Needed Intravitreal Ranibizumab**

*Tatsuya Yoshitake, MD; Tomoaki Murakami, MD, PhD; Kiyoshi Suzuma, MD, PhD;*

*Masahiro Fujimoto, MD; Yoko Dodo, MD; Akitaka Tsujikawa, MD, PhD.*

Department of Ophthalmology and Visual Sciences, Kyoto University Graduate School of Medicine, Kyoto, Japan.

Correspondence and requests for materials should be addressed to Tomoaki Murakami, MD, Department of Ophthalmology and Visual Sciences, Kyoto University Graduate School of Medicine, 54 Shogoin-Kawaracho, Sakyo, Kyoto 606-8507, Japan (phone: 81-75-751-3250; fax: 81-75-752-0933; email: mutomo@kuhp.kyoto-u.ac.jp)

E-mail: mutomo@kuhp.kyoto-u.ac.jp.

**TABLE. Shapiro-Wilk test for normality.**

| Parameter                       | Statistic | Significance |
|---------------------------------|-----------|--------------|
| Age (years)                     | 0.901     | <0.001       |
| Hemoglobin A1c (%)              | 0.885     | <0.001       |
| LogMAR VA                       | 0.861     | <0.001       |
| CSF thickness ( $\mu\text{m}$ ) | 0.952     | 0.013        |
| Disrupted EZ line (%)           | 0.749     | <0.001       |
